# Supplementary material
Source: Copernicus journal article supplement (doi:10.5194/egusphere-2026-2067)
Supplement: Supplementary file 1 [file egusphere-2026-2067-supplement.pdf]

1 **Technical note: Graphical Methods for Screening Annual Maxima and Peaks over Threshold flood data before**  
2 **Flood Frequency Analysis**

3 Paul H. Whitfield<sup>1</sup> and Donald H. Burn<sup>2</sup>

4 <sup>1</sup>Centre for Hydrology, University of Saskatchewan, Canmore, AB, Canada

5 <sup>2</sup>Department of Civil and Environmental Engineering, University of Waterloo, Waterloo, ON, Canada;

6 [Supplementary material:](#)

7 The supplementary material provides these three visualization approaches to flood screening for four different rivers across Canada.  
8 Each visualization is provided for the annual maxima and the second for POT. In plots where POT data were used, they are so  
9 labelled. The four cases span Canada from east to west and are provided so that the reader has access to much broader range of cases  
10 than could be covered in the main paper.

11

12 Table S1. Flood Frequency Analysis Screening checklist with examples.

| <b>Time series plot</b>       | <b>Description</b>                                                                                                                            | <b>Example</b>                 |
|-------------------------------|-----------------------------------------------------------------------------------------------------------------------------------------------|--------------------------------|
| Entire or part years          | Solid points indicate maximum of a complete year, open symbols indicate less than a complete year. Are partial years representative?          | S1a, S4a, S7a,                 |
| Flagged data points           | Are flagged data going to be influential in the analysis?                                                                                     | S1a, S1b,S4a, S4b, S7a, S7b,   |
| Missing years or observations | Large gaps that might affect the analysis?                                                                                                    | S1b, S10a, S10b                |
| Trends                        | Trends in the magnitude that might compromise flood frequency analysis?                                                                       | S1a, S7b, S10b,                |
| Change points                 | Change point that indicates a methodological change, or a structural change related to changes in the seasonal distribution of peaks?         | S1a, S4b, S7b, S10b            |
| <b>Return period plot</b>     |                                                                                                                                               |                                |
| Low outliers                  | Low outliers may be influential in selecting an incorrect distribution.                                                                       | S2a, S2b, S8a,                 |
| High outliers                 | The statistical distribution is fat tailed, or there are many high outliers there may be mixed populations.                                   | S5a, S5b, S11a, S11b           |
| Timing outliers               | Timing outliers, particularly of high magnitude events, may indicate separate rare “Rogue” events generated by an entirely different process. | S2b, S5b, S8a, S8b, S11a, S11b |
| <b>Polar plot</b>             |                                                                                                                                               |                                |
| High / low outliers           | Where do high and low outliers occur seasonally                                                                                               | S3a, S3b, S6a, S6b, S12a, S12b |
| Timing outliers               | Do timing outliers indicate Rogue events?                                                                                                     | S3b, S6b, S9a, S9b             |
| Kernel density                | Is there a single population of events or multiple clusters indicating a single or multiple generating processes?                             | S12a, S12b                     |
| Rogue events                  | Floods that are outliers in magnitude, timing, and/or density                                                                                 | S12a, S12b                     |
| Fuzzy clustering              | Is there a single population of events or multiple clusters indicating a single or multiple generating processes?                             | S3b, S9a, S9b, S12a, S12b      |

13

14

15

a)

b)

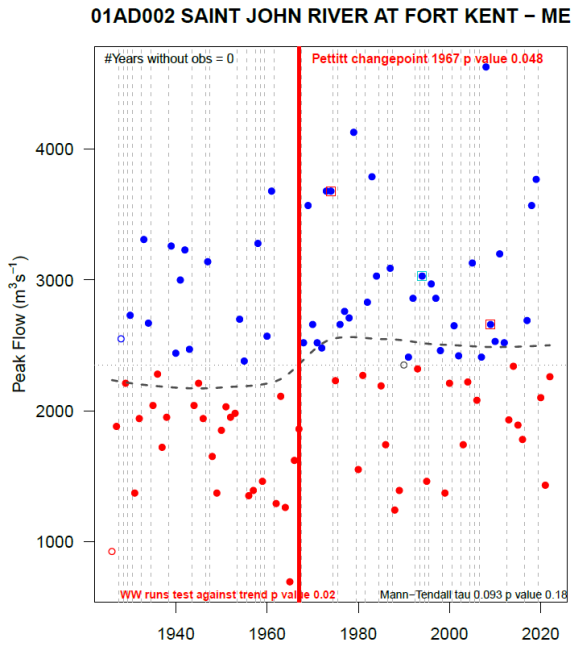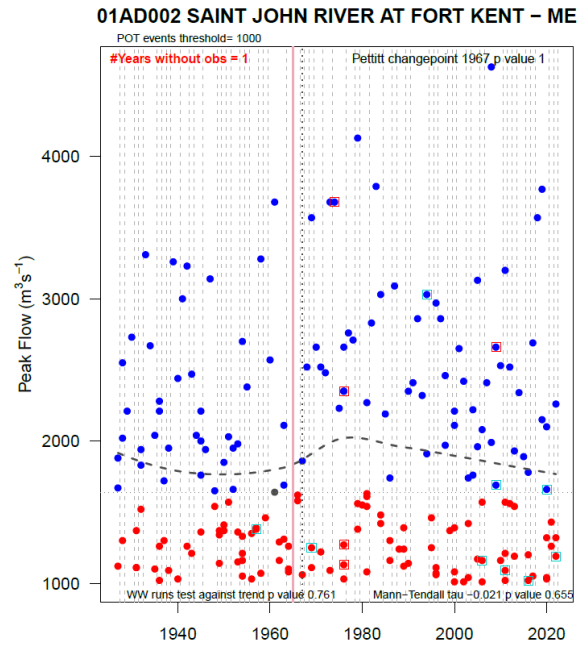

16 Figure S1. Annotated time series plots for (a) annual maximum series, and (b) peaks-over-threshold from 01AD002 St John River at  
 17 Fort Kent, ME. Amax series with partial years have open symbols. Years without observations are shown as pink vertical lines.  
 18 Coloured squares mark points that are flagged by Water Survey of Canada as partial days, backwater, dry, or estimated. Points  
 19 above/below the median are shown in blue/red following Wald-Wolfowitz test against trend. The loess line indicates tendency, and  
 20 shows significance of Mann-Kendall trend test (NS – dotted gray,  $p < 0.10$  - dashed dark red, or  $p < 0.05$  – solid red line). A vertical  
 21 line shows the change point for the Pettitt test following the same scheme. Text indicates the number of years without observations if  $>$   
 22 0 (upper left), Pettitt test (upper right), Wald-Wolfowitz test (lower left), and Mann-Kendall (lower right).

a)

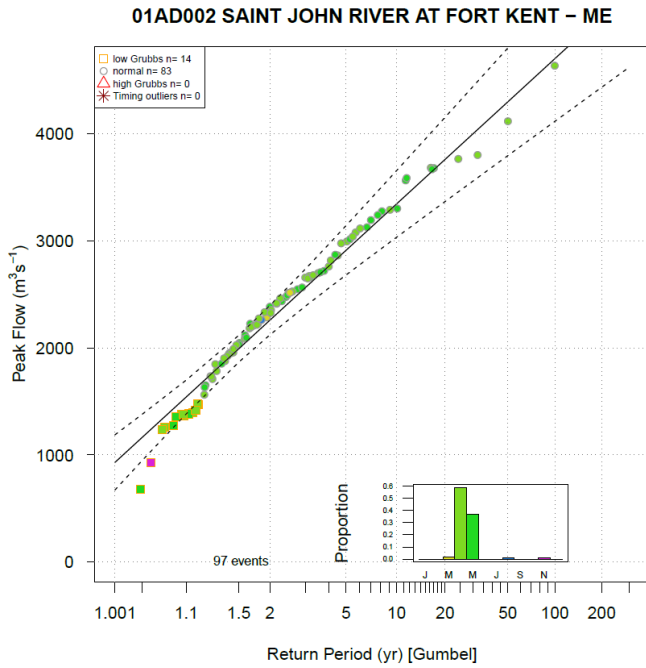

b)

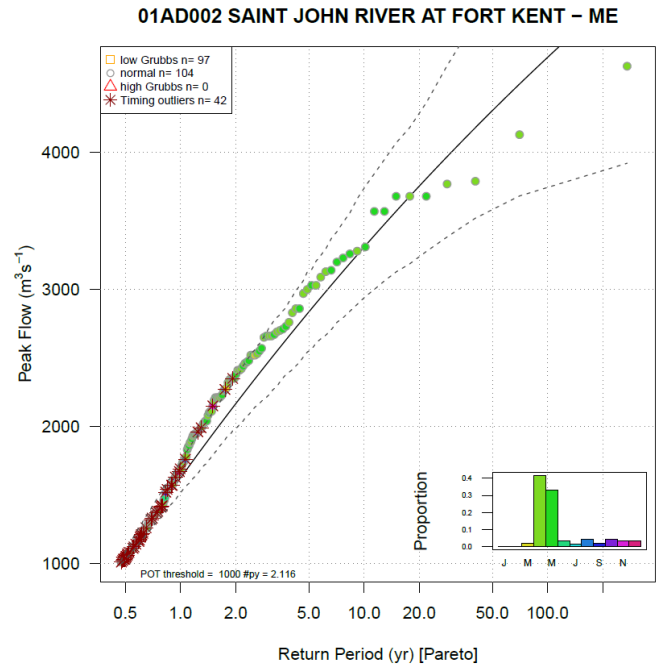

23 Figure S2. Return period plots showing the magnitude of annual maximum flood peaks for (a) annual maximum series, and (b) peaks-  
24 over-threshold series for 01AD002 St John River at Fort Kent, ME. The annual maxima series is shown using Gumbel, and the peaks-  
25 over-threshold using a Pareto. Commonly used plots in flood frequency analysis, here include tests for high, low, and timing outliers.  
26 Symbols indicate whether an observation is a high (triangle), low (square), or timing (asterisk) outliers. The colored symbols indicated  
27 the months of the year thus indicating seasonal distributions of floods and a histogram of these is placed in a corner of the plot to show  
28 the distribution of peaks across months. The legend includes the counts of high, normal, low, and timing outliers.

29

a)

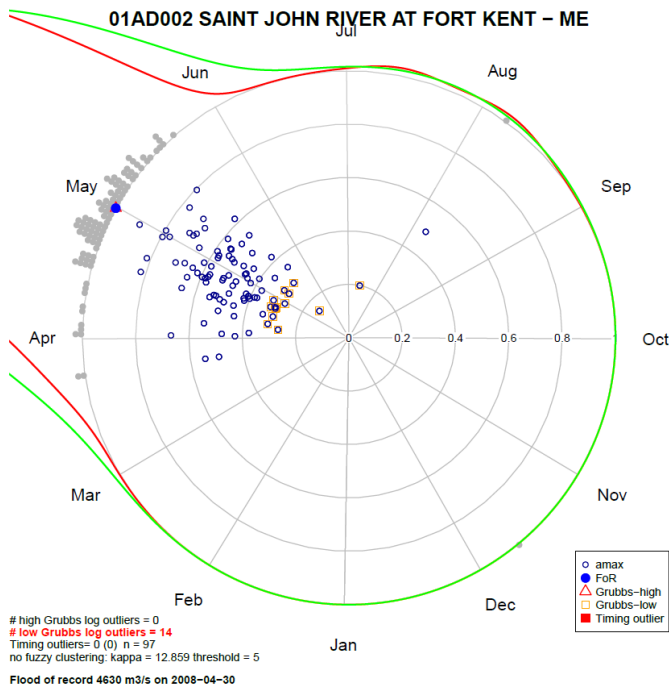

b)

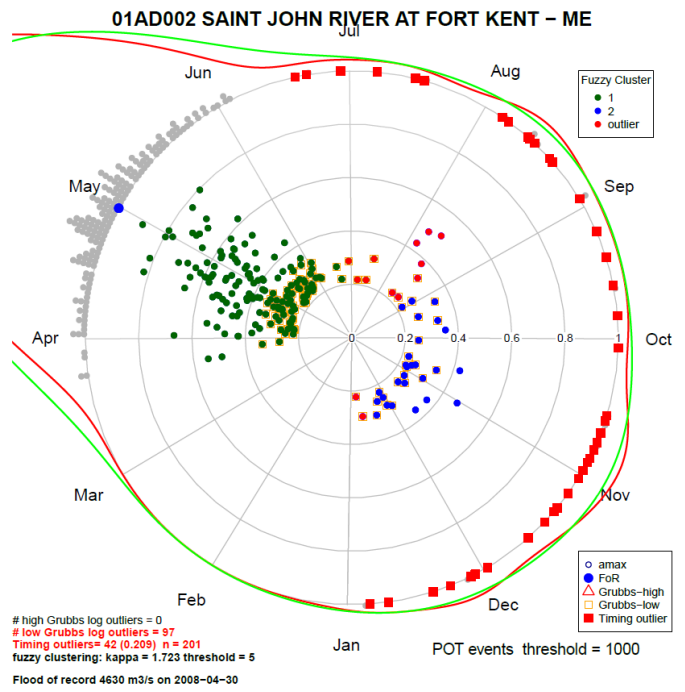

30 Figure S3. Flood series as a polar plot for (a) annual maximum series, and (b) peaks-over-threshold series for 01AD002 St John River  
 31 at Fort Kent, ME. The plots show the seasonal distribution of floods and their relative magnitude on the radial axis. High (red  
 32 triangle) and low (orange square) outliers are marked with surrounding symbols on the main plot. Timing outliers are shown (red solid  
 33 squares) on the unit circle. The flood of record (FoR) is highlighted as a blue dot, and a histogram of individual events is on the  
 34 outside of the circle. Two kernel density estimates (bandwidths of 15 and 50, red and green respectively) as a visual indication of the  
 35 seasonality. Fuzzy clustering is performed when  $\kappa$  is less than 5, and individual maxima are colored based on cluster membership  
 36 shown in the legend in the upper right and may include cluster outliers. Details about the flood of record with the counts of the outliers  
 37 are shown below the plot.

38

a)

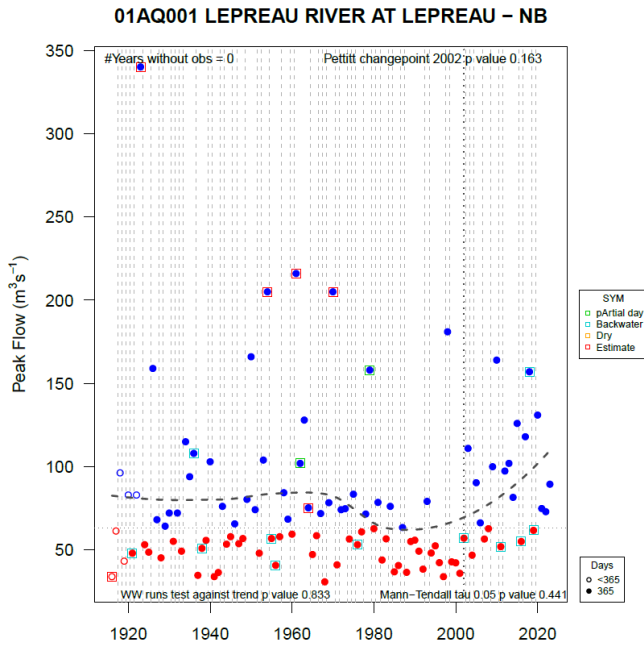

b)

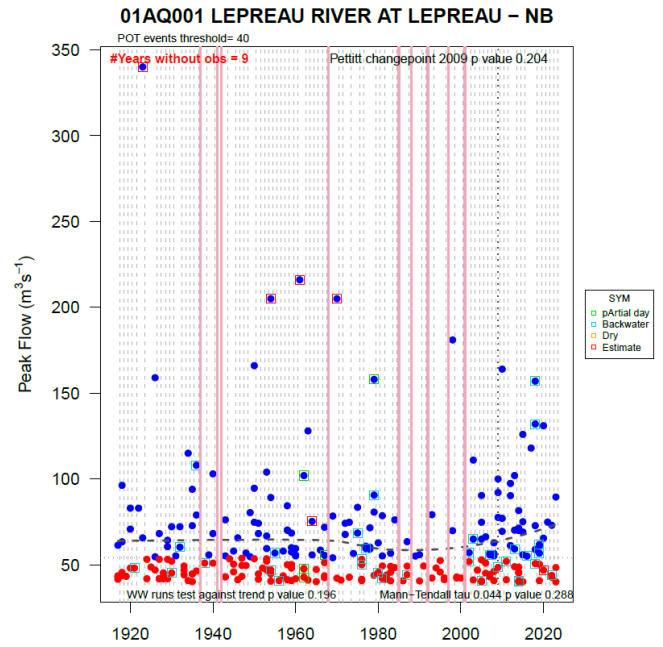

39 Figure S4. Annotated time series plots for (a) annual maximum series, and (b) peaks-over-threshold from 01AQ001 Lepreau River at  
 40 Lepreau, NB. Amax series with partial years have open symbols. Years without observations are shown as pink vertical lines.  
 41 Coloured squares mark points that are flagged by Water Survey of Canada as partial days, backwater, dry, or estimated. Points  
 42 above/below the median are shown in blue/red following Wald-Wolfowitz test against trend. The loess line indicates tendency, and  
 43 shows significance of Mann-Kendall trend test (NS – dotted gray,  $p < 0.10$  - dashed dark red, or  $p < 0.05$  – solid red line). A vertical  
 44 line shows the change point for the Pettitt test following the same scheme. Text indicates the number of years without observations if >  
 45 0 (upper left), Pettitt test (upper right), Wald-Wolfowitz test (lower left), and Mann-Kendall (lower right).

46

a)

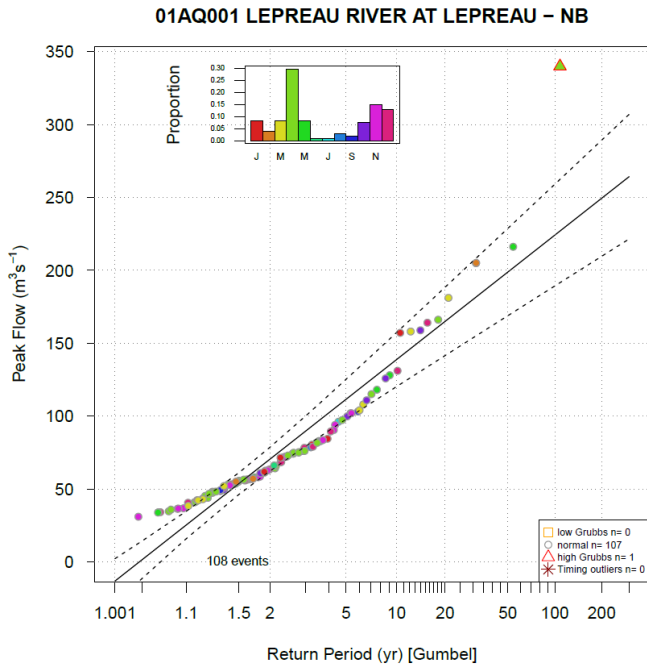

b)

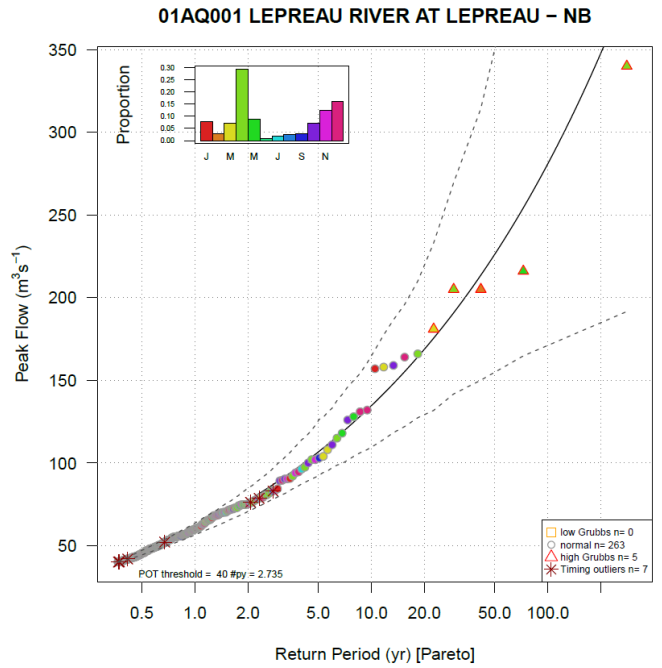

47 Figure S5. Return period plots showing the magnitude of annual maximum flood peaks for (a) annual maximum series, and (b) peaks-  
 48 over-threshold series for 01AQ001 Lepreau River at Lepreau, NB. The annual maxima series is shown using Gumbel, and the peaks-  
 49 over-threshold using a Pareto. Commonly used plots in flood frequency analysis, here include tests for high, low, and timing outliers.  
 50 Symbols indicate whether an observation is a high (triangle), low (square), or timing (asterisk) outliers. The colored symbols indicated  
 51 the months of the year thus indicating seasonal distributions of floods and a histogram of these is placed in a corner of the plot to show  
 52 the distribution of peaks across months. The legend includes the counts of high, normal, low, and timing outliers.

53

a)

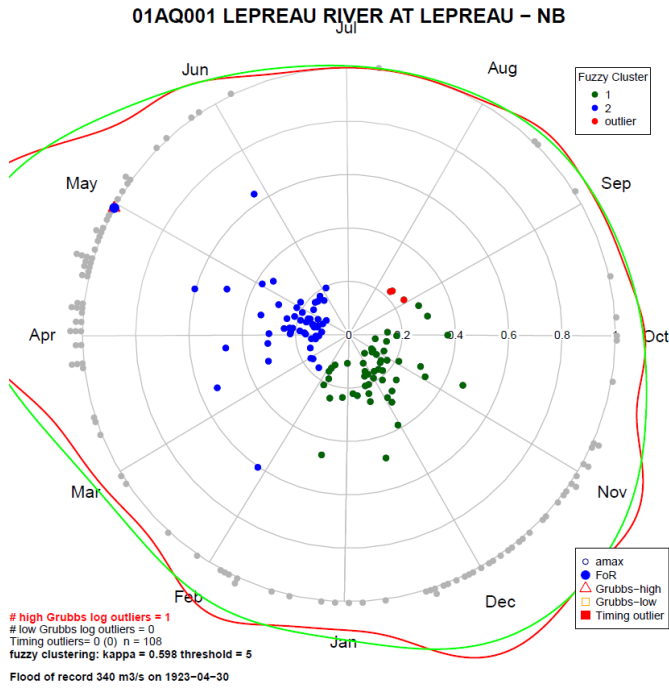

b)

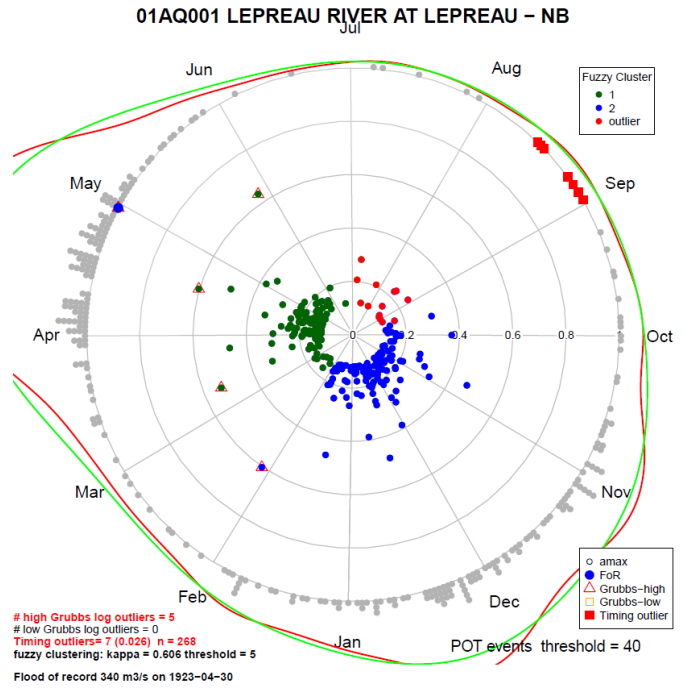

54 Figure S6. Flood series as a polar plot for (a) annual maximum series, and (b) peaks-over-threshold series for 01AQ001 Lepreau River  
 55 at Lepreau, NB. The plots show the seasonal distribution of floods and their relative magnitude on the radial axis. High (red triangle)  
 56 and low (orange square) outliers are marked with surrounding symbols on the main plot. Timing outliers are shown (red solid squares)  
 57 on the unit circle. The flood of record (FoR) is highlighted as a blue dot, and a histogram of individual events is on the outside of the  
 58 circle. Two kernel density estimates (bandwidths of 15 and 50, red and green respectively) as a visual indication of the seasonality.  
 59 Fuzzy clustering is performed when  $\kappa$  is less than 5, and individual maxima are colored based on cluster membership shown in the  
 60 legend in the upper right and may include cluster outliers. Details about the flood of record with the counts of the outliers are shown  
 61 below the plot.

62

a)

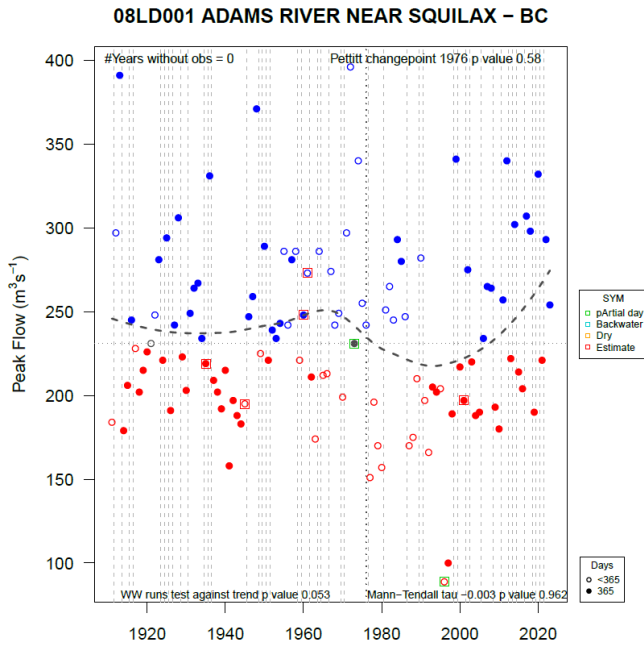

b)

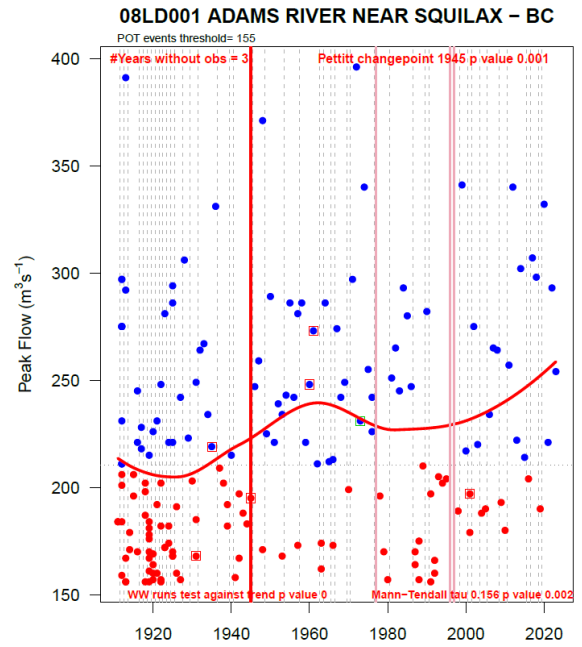

63 Figure S7. Annotated time series plots for (a) annual maximum series, and (b) peaks-over-threshold from 08LD001 Adams River near  
 64 Squilax, BC. Amax series with partial years have open symbols. Years without observations are shown as pink vertical lines. Coloured  
 65 squares mark points that are flagged by Water Survey of Canada as partial days, backwater, dry, or estimated. Points above/below the  
 66 median are shown in blue/red following Wald-Wolfowitz test against trend. The loess line indicates tendency, and shows significance  
 67 of Mann-Kendall trend test (NS – dotted gray,  $p < 0.10$  - dashed dark red, or  $p < 0.05$  – solid red line). A vertical line shows the change  
 68 point for the Pettitt test following the same scheme. Text indicates the number of years without observations if  $> 0$  (upper left), Pettitt  
 69 test (upper right), Wald-Wolfowitz test (lower left), and Mann-Kendall (lower right).

70

a)

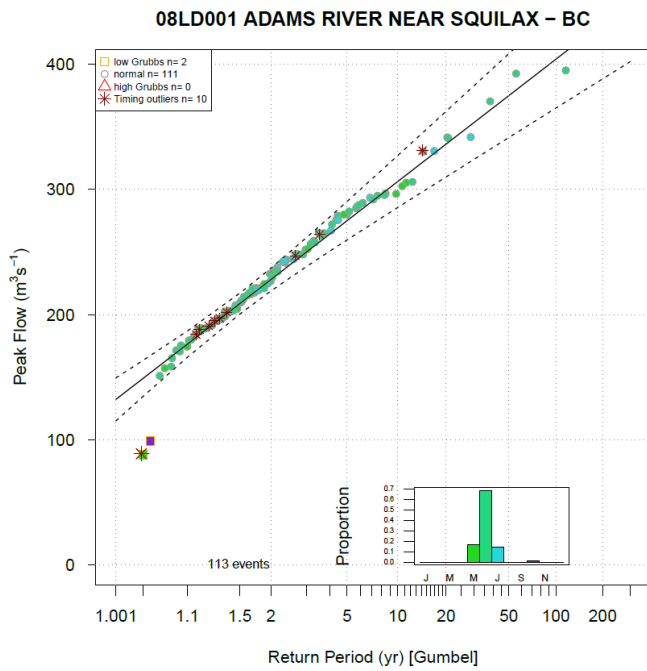

b)

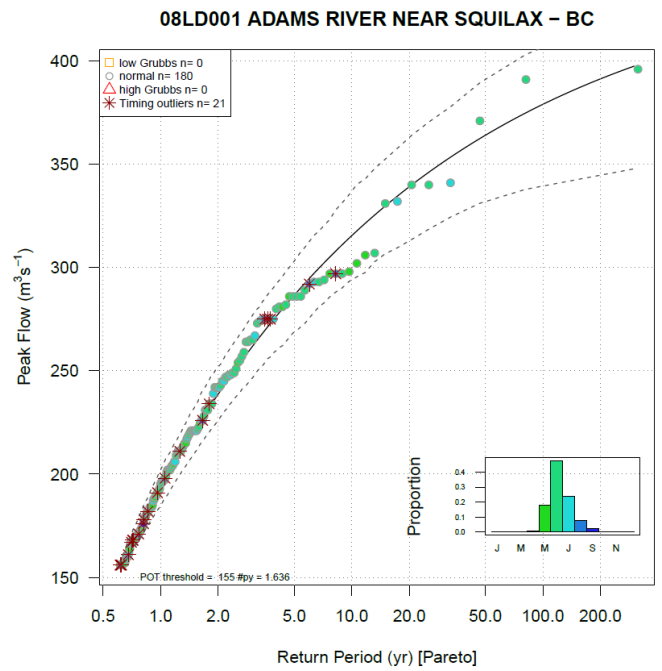

71 Figure S8. Return period plots showing the magnitude of annual maximum flood peaks for (a) annual maximum series, and (b) peaks-  
 72 over-threshold series for 08LD001 Adams River near Squilax, BC. The annual maxima series is shown using Gumbel, and the peaks-  
 73 over-threshold using a Pareto. Commonly used plots in flood frequency analysis, here include tests for high, low, and timing outliers.  
 74 Symbols indicate whether an observation is a high (triangle), low (square), or timing (asterisk) outliers. The colored symbols indicated  
 75 the months of the year thus indicating seasonal distributions of floods and a histogram of these is placed in a corner of the plot to show  
 76 the distribution of peaks across months. The legend includes the counts of high, normal, low, and timing outliers.

77

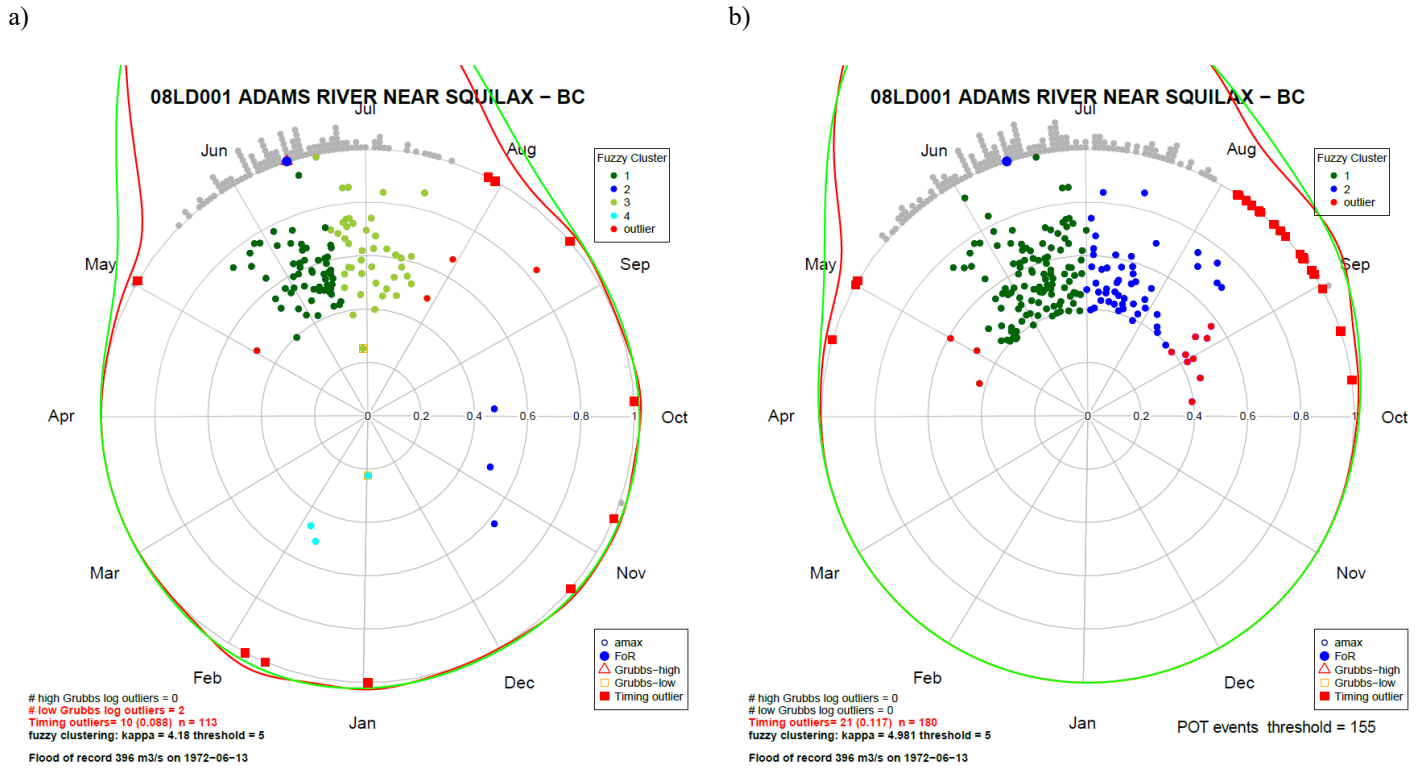

78 Figure S9. Flood series as a polar plot for (a) annual maximum series, and (b) peaks-over-threshold series for 08LD001 Adams River  
 79 near Squilax, BC. The plots show the seasonal distribution of floods and their relative magnitude on the radial axis. High (red triangle)  
 80 and low (orange square) outliers are marked with surrounding symbols on the main plot. Timing outliers are shown (red solid squares)  
 81 on the unit circle. The flood of record (FoR) is highlighted as a blue dot, and a histogram of individual events is on the outside of the  
 82 circle. Two kernel density estimates (bandwidths of 15 and 50, red and green respectively) as a visual indication of the seasonality.  
 83 Fuzzy clustering is performed when  $\kappa$  is less than 5, and individual maxima are colored based on cluster membership shown in the  
 84 legend in the upper right and may include cluster outliers. Details about the flood of record with the counts of the outliers are shown  
 85 below the plot.

86

a)

b)

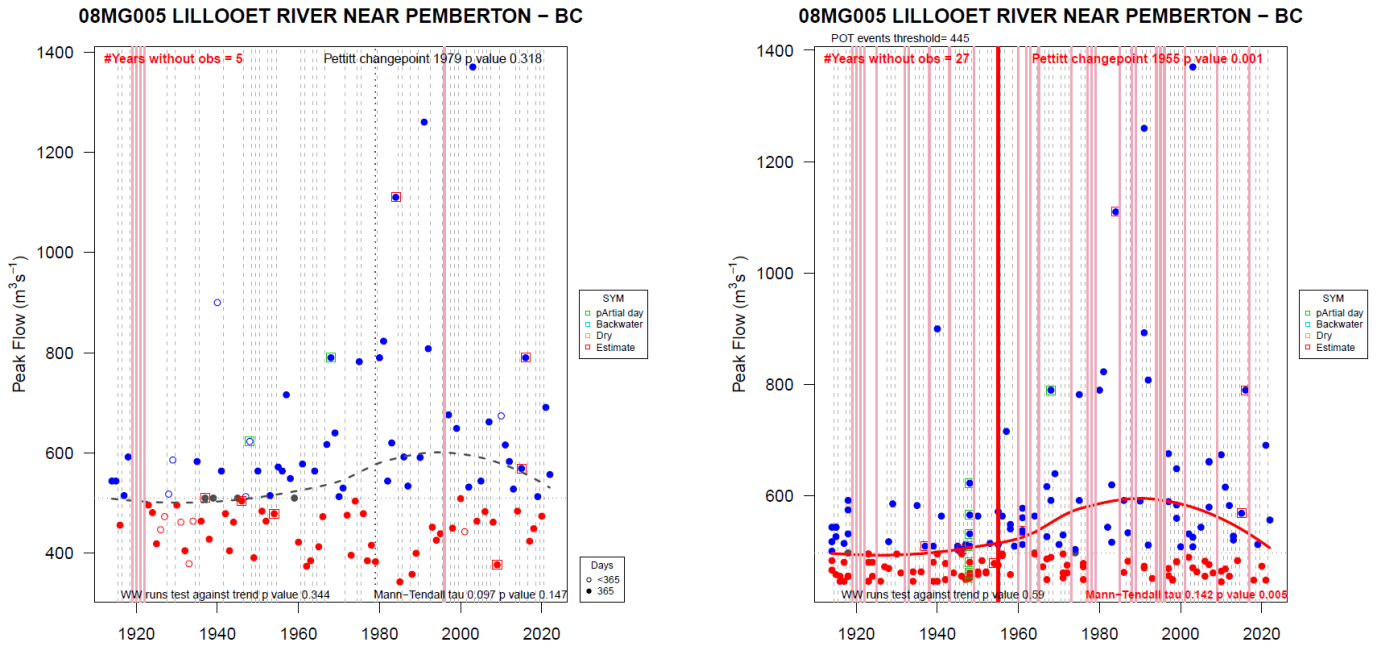

87 Figure S10. Annotated time series plots for (a) annual maximum series, and (b) peaks-over-threshold from 08MG005 Lillooet River  
 88 near Pemberton, BC. Amax series with partial years have open symbols. Years without observations are shown as pink vertical lines.  
 89 Coloured squares mark points that are flagged by Water Survey of Canada as partial days, backwater, dry, or estimated. Points  
 90 above/below the median are shown in blue/red following Wald-Wolfowitz test against trend. The loess line indicates tendency, and  
 91 shows significance of Mann-Kendall trend test (NS – dotted gray,  $p < 0.10$  - dashed dark red, or  $p < 0.05$  – solid red line). A vertical  
 92 line shows the change point for the Pettitt test following the same scheme. Text indicates the number of years without observations if >  
 93 0 (upper left), Pettitt test (upper right), Wald-Wolfowitz test (lower left), and Mann-Kendall (lower right).

94

a)

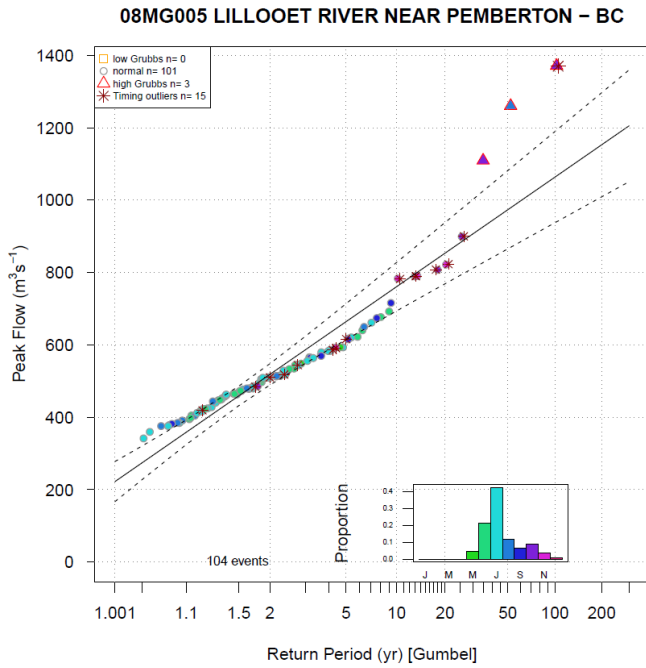

b)

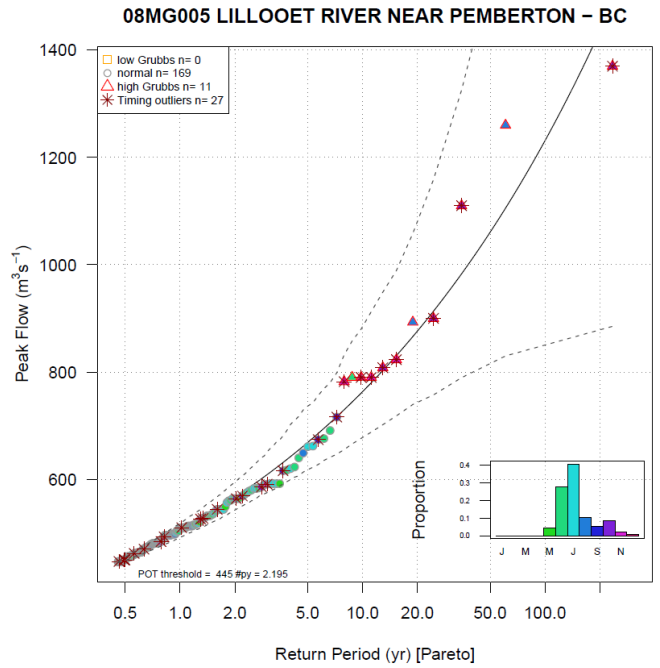

95 Figure S11. Return period plots showing the magnitude of annual maximum flood peaks for (a) annual maximum series, and (b)  
96 peaks-over-threshold series for 08MG005 Lillooet River near Pemberton, BC. The annual maxima series is shown using Gumbel, and  
97 the peaks-over-threshold using a Pareto. Commonly used plots in flood frequency analysis, here include tests for high, low, and timing  
98 outliers. Symbols indicate whether an observation is a high (triangle), low (square), or timing (asterisk) outliers. The colored symbols  
99 indicated the months of the year thus indicating seasonal distributions of floods and a histogram of these is placed in a corner of the  
100 plot to show the distribution of peaks across months. The legend includes the counts of high, normal, low, and timing outliers.

101

a)

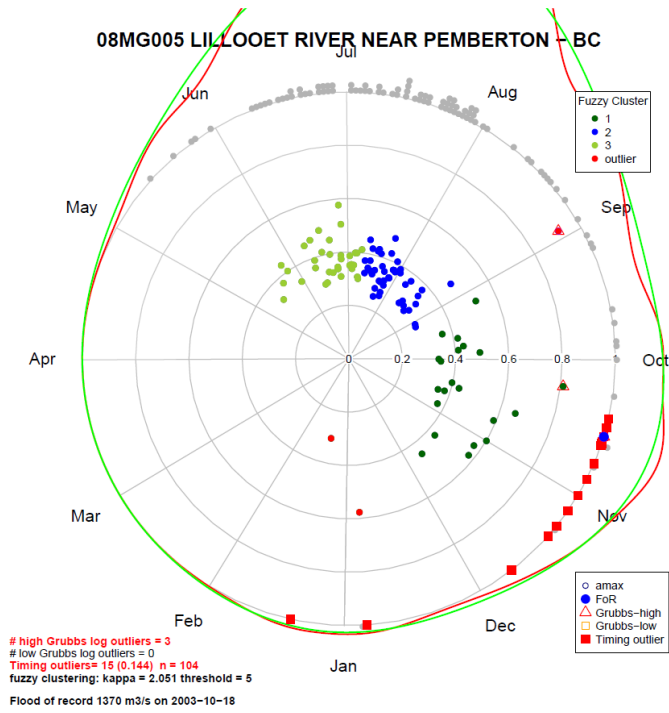

b)

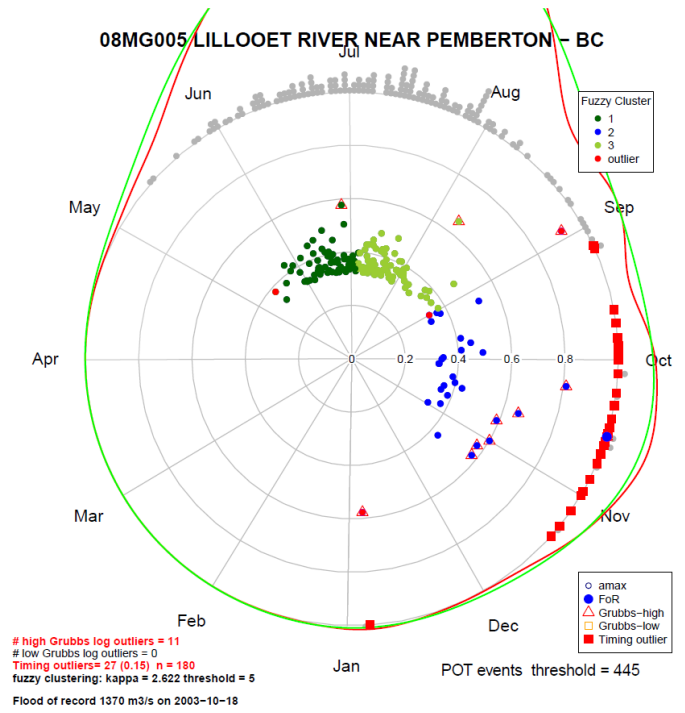

102 Figure S12. Flood series as a polar plot for (a) annual maximum series, and (b) peaks-over-threshold series for 08MG005 Lillooet  
 103 River near Pemberton, BC. The plots show the seasonal distribution of floods and their relative magnitude on the radial axis. High (red  
 104 triangle) and low (orange square) outliers are marked with surrounding symbols on the main plot. Timing outliers are shown (red solid  
 105 squares) on the unit circle. The flood of record (FoR) is highlighted as a blue dot, and a histogram of individual events is on the  
 106 outside of the circle. Two kernel density estimates (bandwidths of 15 and 50, red and green respectively) as a visual indication of the  
 107 seasonality. Fuzzy clustering is performed when  $\kappa$  is less than 5, and individual maxima are colored based on cluster membership  
 108 shown in the legend in the upper right and may include cluster outliers. Details about the flood of record with the counts of the outliers  
 109 are shown below the plot.
